# Supplementary material for: Sexual selection and inbreeding: Two efficient ways to limit the accumulation of deleterious mutations
Source: PubMed Central journal article supplement (PMC6369961; doi:10.1002/evl3.93), 2018-12-10
Supplement: EVL3-3-80-s001.pdf [file EVL3-3-80-s001.pdf]

M, C, F, S

90 virgin adults per line

Generation N

M, C

F, S<sub>even</sub>

S<sub>odd</sub>

Mass-mating

Pair-mating

Selfing

REPRODUCTION

M, C, F, S

Collect egg masses of each adult in separate boxes, let them hatch

M

C, F, S

Regulation

(collect a fixed number of juveniles per mother)

No regulation

Collect all juveniles (mothers have unequal contributions)

JUVENILE COLLECTION

M, C, F, S

Pool juveniles, then raise them in standard conditions and sample 98 of them

90 virgin adults per line

Generation N+1
